# Supplementary material for: Inevitability of disease recurrence after liver transplantation for NAFLD cirrhosis
Source: PubMed Central journal article supplement — JHEP Rep. 2023 Jan 3;5(3):100668. doi: 10.1016/j.jhepr.2022.100668 (PMC9957774; doi:10.1016/j.jhepr.2022.100668), 2023-01-03
Supplement: mmc1.pdf [file mmc1.pdf]

**Supplemental information**

**Inevitability of disease recurrence after liver transplantation for NAFLD cirrhosis**

**François Villeret, Sébastien Dharancy, Domitille Erard, Armand Abergel, Louise Barbier, Camille Besch, Olivier Boillot, Karim Boudjema, Audrey Coilly, Filomena Conti, Christophe Corpechot, Christophe Duvoux, François Faitot, Stéphanie Faure, Claire Francoz, Emiliano Giostra, Jean Gugenheim, Jean Hardwigsen, Marie-Noëlle Hilleret, Jean-Baptiste Hiriart, Pauline Houssel-Debry, Nassim Kamar, Guillaume Lassailly, Marianne Latournerie, Georges-Philippe Pageaux, Didier Samuel, Claire Vanlemmens, Faouzi Saliba, and Jérôme Dumortier**

**Disease recurrence after liver transplantation for NAFLD cirrhosis is  
ineluctable**

François Villeret, Sébastien Dharancy, Domitille Erard, Armand Abergel, Louise Barbier, Camille Besch, Olivier Boillot, Karim Boudjema, Audrey Coilly, Filomena Conti, Christophe Corpechot, Christophe Duvoux, François Faitot, Stéphanie Faure, Claire Francoz, Emiliano Giostra, Jean Gugenheim, Jean Hardwigsen, Marie-Noëlle Hilleret, Jean-Baptiste Hiriart, Pauline Housel-Debry, Nassim Kamar, Guillaume Lassailly, Marianne Latournerie, Georges-Philippe Pageaux, Didier Samuel, Claire Vanlemmens, Faouzi Saliba, Jérôme Dumortier

Table of contents

Table S1.....2  
Table S2.....3  
Table S3.....4

**Table S1. Distribution of components of MS before and after LT in patients with liver biopsy in follow-up (n=150).**

| <b><u>Parameters</u></b>                     | <b><u>Before LT</u></b>       |                    | <b><u>After LT</u></b> |                       |
|----------------------------------------------|-------------------------------|--------------------|------------------------|-----------------------|
|                                              | <b><u>Presence or not</u></b> | Number of patients | <b><u>Presence</u></b> | <b><u>Absence</u></b> |
| <b><u>Arterial hypertension</u></b>          | Presence                      | 122 (81.3%)        | 117                    | 5                     |
|                                              | Absence                       | 28 (18.7%)         | 24                     | 4                     |
| <b><u>Diabetes</u></b>                       | Presence                      | 112 (74.7%)        | 100                    | 12                    |
|                                              | Absence                       | 38 (25.3%)         | 11                     | 27                    |
| <b><u>Obesity*</u></b>                       | Presence                      | 86 (57.3%)         | 71                     | 15                    |
|                                              | Absence                       | 64 (42.7%)         | 18                     | 46                    |
| <b><u>Dyslipidemia or lipid drugs **</u></b> | Presence                      | 28 (18.7%)         | 24                     | 4                     |
|                                              | Absence                       | 122 (81.3%)        | 94                     | 28                    |
| <b><u>Metabolic syndrome</u></b>             | Presence                      | 77 (51.3%)         | 69                     | 8                     |
|                                              | Absence                       | 73 (48.7%)         | 58                     | 15                    |

*LDL-c: Low-Density Lipoproteins; LT: Liver Transplantation; TG: triglycerides.*

*\*: Defined by a BMI greater than 30kg/m<sup>2</sup>*

*\*\* : Defined by the presence of statin or fibrate therapy, or the presence of an increase in LDL-c > 2g/L or/and TG > 1.5G/L*

**Table S2. Distribution of disease recurrence according to the overall cohort and the protocol centers.**

|                   | <u>All patients</u> |                     |            |                    | <u>Centers with biopsy protocol</u> |                     |            |                    |
|-------------------|---------------------|---------------------|------------|--------------------|-------------------------------------|---------------------|------------|--------------------|
|                   | Number of patients  | Steatosis ≥ grade 2 | NASH       | Fibrosis stage ≥F2 | Number of patients                  | Steatosis ≥ grade 2 | NASH       | Fibrosis stage ≥F2 |
| 1 year after LT   | 126                 | 22 (17.5%)          | 13 (10.3%) | 20 (15.9%)         | 103                                 | 20 (19.4%)          | 9 (8.7%)   | 18 (17.4%)         |
| 3 years after LT  | 43                  | 17 (39.5%)          | 13 (30.2%) | 15 (34.9%)         | 31                                  | 13 (41.9%)          | 10 (32.3%) | 14 (45.2%)         |
| 5 years after LT  | 36                  | 16 (44.4%)          | 14 (38.9%) | 17 (47.2%)         | 25                                  | 11 (44.0%)          | 9 (36.0%)  | 12 (48.0%)         |
| 10 years after LT | 17                  | 9 (52.9%)           | 8 (47.1%)  | 11 (64.7%)         | 12                                  | 6 (50.0%)           | 5 (41.7%)  | 9 (75.0%)          |

*LT: Liver Transplantation; NASH: Non-Alcoholic Steatohepatitis*

**Table S3. Recurrence of Initial Graft Disease after Liver Transplantation for NAFLD Cirrhosis (Major studies with liver histological evaluation).**

| Studies                                            | Follow-up after LT (years) | Steatosis recurrence on liver biopsies    | NASH recurrence on liver biopsies           | Advances fibrosis on liver biopsies     | Risk factors for NAFLD recurrence                                                                             |                                                                                     | Risk factors for NASH recurrence                                                                        |                                                                                                                               | Risk factors for advanced fibrosis recurrence                                                                                    |                                                                                                        |
|----------------------------------------------------|----------------------------|-------------------------------------------|---------------------------------------------|-----------------------------------------|---------------------------------------------------------------------------------------------------------------|-------------------------------------------------------------------------------------|---------------------------------------------------------------------------------------------------------|-------------------------------------------------------------------------------------------------------------------------------|----------------------------------------------------------------------------------------------------------------------------------|--------------------------------------------------------------------------------------------------------|
|                                                    |                            |                                           |                                             |                                         | Univariate analysis                                                                                           | Multivariate analysis                                                               | Univariate analysis                                                                                     | Multivariate analysis                                                                                                         | Univariate analysis                                                                                                              | Multivariate analysis                                                                                  |
| Bhagat <i>and al.</i> (2009) <sup>1</sup>          | 0.5                        | 21/64 (32.8%)*                            |                                             | 0/64 (0%)                               | -                                                                                                             | -                                                                                   | -                                                                                                       | -                                                                                                                             | -                                                                                                                                | -                                                                                                      |
| Yalamanchili <i>and al.</i> (2010) <sup>2</sup>    | 1<br>5<br>10               | 3/18 (18%)<br>8/18 (44%)                  | 0/18 (0%)<br>1/18 (6%)<br>3/18 (16%)        | 0/18<br>1/18 (5.5%)<br>2/18 (11.1%)     | -                                                                                                             | -                                                                                   | -                                                                                                       | -                                                                                                                             | -                                                                                                                                | -                                                                                                      |
| Dureja <i>and al.</i> (2011) <sup>3</sup>          | 0.9                        | 34/88 (38.6%)                             | 9/88 (10.2%)                                | 3/88 (3.4%)                             | BMI pre-LT<br>BMI post-LT<br>Corticoids<br>Post-LT triglycerides<br>Post-LT Diabetes<br>Arterial hypertension | BMI pre-LT (OR: 1.15)<br>BMI post-LT (OR: 1.22)<br>Post-LT triglycerides (OR: 1.01) | -                                                                                                       | -                                                                                                                             | -                                                                                                                                | -                                                                                                      |
| Malik <i>and al.</i> (2009) <sup>4</sup>           | 1.2                        | 55/79 (69.6%)                             | 19/79 (24.1%)                               | 7/79 (7.6%)                             | -                                                                                                             | -                                                                                   | -                                                                                                       | -                                                                                                                             | -                                                                                                                                | -                                                                                                      |
| Vallin <i>and al.</i> (2014) <sup>5</sup>          | 1<br>5                     | 11/11 (100%)<br>7/7 (100%)                | 9/11 (81.8%)<br>5/7 (71.4%)                 | 2/11 (18.2%)<br>5/7 (71.4%)             | -                                                                                                             | -                                                                                   | -                                                                                                       | -                                                                                                                             | -                                                                                                                                | -                                                                                                      |
| Sourianarayanan <i>and al.</i> (2017) <sup>6</sup> | 1<br>3<br>5                | 7/44 (16%)*<br>4/18 (22%)*<br>6/17 (35%)* | 3/44 (6.8%)<br>4/18 (22.2%)<br>5/17 (29.4%) | 1/44 (2.3%)<br>0/18 (0%)<br>1/17 (5.9%) | -                                                                                                             | -                                                                                   | -                                                                                                       | -                                                                                                                             | -                                                                                                                                | -                                                                                                      |
| Bhati <i>and al.</i> (2017) <sup>7</sup>           | 3.9                        | 30/34 (88.2%)                             | 14/34(41.2%)                                | 7/34 (20.6%)                            | Post-LT Diabetes<br>Post-LT triglycerides                                                                     | -                                                                                   | Post-LT Diabetes<br>Post-LT triglycerides                                                               | -                                                                                                                             | -                                                                                                                                | -                                                                                                      |
| Villeret <i>and al.</i> (2022)                     | 1<br>5                     | 81/150 (62.0%)**<br>104/150 (85.0%)**     | 10/150 (10.4%)**<br>34/150 (60.3%)**        | 0/150 (0.0%)**<br>10/150 (20.0%)**      | BMI at LT<br>Pre-LT MS<br>Donors Age > 60Y<br>BMI at 1 year post LT<br>Post-LT Hb1Ac > 8%<br>lipid drugs      | BMI pre-LT (OR: 2.7)                                                                | Age at LT<br>BMI pre-LT<br>BMI at 1 year<br>Post-LT HDLc < 1.15mmol/L<br>Steatosis recurrence at 1 year | Age < 65y at LT (OR:4.214 )<br>Post-LT HDLc < 1.15mmol/L (OR : 3.463 )<br>Grade 2 Steatosis recurrence at 1 year (OR :10.196) | Age at LT<br>BMI pre-LT<br>Pre-LT MS<br>No HCC at LT<br>BMI at 1 year<br>Long term CYA<br>Grade 2 steatosis recurrence at 1 year | Pre-LT MS (OR : 8.6)<br>Long term CYA (OR: 11.4)<br>Grade 2 steatosis recurrence at 1 year (OR : 10.7) |

\* Steatosis between 34-66%.

\*\* Cumulative incidence rate

*BMI: Body Mass Index; CYA: cyclosporine A; HCC: Hepatocellular Carcinoma; HDL-c: High-Density Lipoproteins Cholesterol; LDL-c: Low-Density Lipoproteins; LT: Liver Transplantation; MS: Metabolic Syndrome; OR: Odds ratio.*

## Supplementary references

1. Bhagat V, Mindikoglu AL, Nudo CG, Schiff ER, Tzakis A, Regev A. Outcomes of liver transplantation in patients with cirrhosis due to nonalcoholic steatohepatitis versus patients with cirrhosis due to alcoholic liver disease. *Liver Transplant. Off. Publ. Am. Assoc. Study Liver Dis. Int. Liver Transplant. Soc.* 2009;15:1814–1820.
2. Yalamanchili K, Saadeh S, Klintmalm GB, Jennings LW, Davis GL. Nonalcoholic fatty liver disease after liver transplantation for cryptogenic cirrhosis or nonalcoholic fatty liver disease. *Liver Transplant. Off. Publ. Am. Assoc. Study Liver Dis. Int. Liver Transplant. Soc.* 2010;16:431–439.
3. Dureja P, Mellinger J, Agni R, Chang F, Avey G, Lucey M, et al. NAFLD recurrence in liver transplant recipients. *Transplantation.* 2011;91:684–689.
4. Malik SM, deVera ME, Fontes P, Shaikh O, Ahmad J. Outcome after liver transplantation for NASH cirrhosis. *Am. J. Transplant. Off. J. Am. Soc. Transplant. Am. Soc. Transpl. Surg.* 2009;9:782–793.
5. Vallin M, Guillaud O, Boillot O, Hervieu V, Scoazec J-Y, Dumortier J. Recurrent or de novo nonalcoholic fatty liver disease after liver transplantation: natural history based on liver biopsy analysis. *Liver Transplant. Off. Publ. Am. Assoc. Study Liver Dis. Int. Liver Transplant. Soc.* 2014;20:1064–1071.
6. Sourianarayanan A, Arikapudi S, McCullough AJ, Humar A. Nonalcoholic steatohepatitis recurrence and rate of fibrosis progression following liver transplantation: *Eur. J. Gastroenterol. Hepatol.* 2017;29:481–487.
7. Bhati C, Idowu MO, Sanyal AJ, Rivera M, Driscoll C, Stravitz RT, et al. Long-term Outcomes in Patients Undergoing Liver Transplantation for Nonalcoholic Steatohepatitis-Related Cirrhosis. *Transplantation.* 2017;101:1867–1874.
